# Supplementary material
Source: PubMed Central journal article supplement (PMC3196441)
Supplement: supp_85_19_9726__1.pdf [file supp_85_19_9726__1.pdf]

| Probe ID     | Gene title                                                                                            | Common name | Fold change compared to mock-infected |                 |
|--------------|-------------------------------------------------------------------------------------------------------|-------------|---------------------------------------|-----------------|
|              |                                                                                                       |             | Survived rat #1                       | Survived rat #2 |
| 1371152_a_at | 25 oligoadenylate synthetase                                                                          | Oas1        | 2.871                                 | 27.280          |
| 1370902_at   | aldose reductase-likan protein                                                                        | LOC286921   | 2.138                                 | 3.398           |
| 1367794_at   | alpha-2-macroglobulin                                                                                 | A2m         | 2.200                                 | 2.139           |
| 1368270_at   | apolipoprotein B editing complex 1                                                                    | Apobec1     | 4.595                                 | 41.620          |
| 1371440_at   | beta-2 microglobulin                                                                                  | B2m         | 2.522                                 | 9.704           |
| 1389470_at   | B-factor, properdin                                                                                   | Bf          | 4.866                                 | 21.660          |
| 1369186_at   | caspase 1                                                                                             | Casp1       | 2.119                                 | 11.680          |
| 1387605_at   | caspase 12                                                                                            | Casp12      | 2.762                                 | 2.541           |
| 1368555_at   | CD37 antigen                                                                                          | CD37        | 2.014                                 | 11.760          |
| 1367679_at   | CD74 antigen (invariant polypeptide of MHC class II antigen-associated)                               | CD74        | 2.370                                 | 124.300         |
| 1387627_at   | CD86 antigen                                                                                          | CD86        | 2.943                                 | 4.028           |
| 1368420_at   | ceruloplasmin                                                                                         | Cp          | 2.073                                 | 16.910          |
| 1393219_at   | complement component 2                                                                                | C2          | 6.541                                 | 31.380          |
| 1368000_at   | complement component 3                                                                                | C3          | 8.682                                 | 136.600         |
| 1367850_at   | Fc receptor, IgG, low affinity III                                                                    | Fcgr3       | 2.023                                 | 5.806           |
| 1368332_at   | guanylate binding protein 2, interferon-inducible                                                     | Gbp2        | 3.765                                 | 75.940          |
| 1387770_at   | interferon, alpha-inducible protein 27-like                                                           | Isg12(a)    | 2.399                                 | 6.871           |
| 1371095_at   | kinesin-related protein 3                                                                             | Krp3        | 2.765                                 | 2.466           |
| 1370056_at   | Ly6-C antigen gene                                                                                    | Ly6b        | 4.000                                 | 162.200         |
| 1373544_at   | monokine induced by gamma interferon                                                                  | Mig         | 9.500                                 | 30.110          |
| 1371015_at   | myxovirus (influenza virus) resistance                                                                | Mx1         | 2.036                                 | 6.423           |
| 1370892_at   | palmitoyl-protein thioesterase 2                                                                      | C4a         | 3.206                                 | 12.300          |
| 1387946_at   | peptidylprolyl isomerase C-associated protein                                                         | Ppicap      | 2.252                                 | 15.980          |
| 1368492_at   | prostaglandin D2 synthase 2                                                                           | Ptgds2      | 2.425                                 | 3.800           |
| 1367786_at   | proteasome subunit, beta type 8                                                                       | Psmb8       | 4.663                                 | 32.430          |
| 1370186_at   | proteasome subunit, beta type 9                                                                       | Psmb9       | 2.975                                 | 37.700          |
| 1370383_s_at | Rat MHC RT1 class II E-beta chain mRNA 3'end                                                          | RT1-Db1     | 29.140                                | 51.530          |
| 1372064_at   | Rattus norvegicus CDK104 mRNA                                                                         |             | 2.106                                 | 15.590          |
| 1391754_at   | Rattus norvegicus similar to 25 oligoadenylate synthetase, mRNA                                       | LOC246268   | 2.478                                 | 9.125           |
| 1390287_at   | Rattus norvegicus similar to Breast cancer associated protein BRAP1, mRNA                             |             | 2.202                                 | 9.515           |
| 1381311_at   | Rattus norvegicus similar to cell surface glycoprotein, mRNA                                          | Emr1        | 2.902                                 | 11.870          |
| 1385047_x_at | Rattus norvegicus similar to cell surface receptor FDFACT, mRNA                                       |             | 2.497                                 | 3.061           |
| 1395003_at   | Rattus norvegicus similar to C-type lectin, superfamily member 6; dendritic cell immunoreceptor, mRNA | Dcir4       | 4.401                                 | 8.195           |
| 1382153_at   | Rattus norvegicus similar to dendritic cell immunoreceptor, mRNA                                      | Clecsf6     | 2.320                                 | 7.271           |
| 1372404_at   | Rattus norvegicus similar to EN-7 protein, mRNA                                                       | MGC105983   | 4.002                                 | 2.359           |
| 1383564_at   | Rattus norvegicus similar to interferon regulatory factor 7, mRNA                                     |             | 2.586                                 | 5.818           |
| 1373992_at   | Rattus norvegicus similar to interferon-inducible GTPase, mRNA                                        |             | 3.387                                 | 2.945           |
| 1387314_at   | Rattus norvegicus similar to interferon-stimulated protein, mRNA                                      |             | 3.365                                 | 15.500          |
| 1390507_at   | Rattus norvegicus similar to interferon-stimulated protein; DnaQL protein, mRNA                       | Isg20       | 2.182                                 | 4.782           |
| 1391489_at   | Rattus norvegicus similar to LRG-47, mRNA                                                             |             | 2.004                                 | 13.810          |
| 1395126_at   | Rattus norvegicus similar to MMAN-g, mRNA                                                             |             | 3.368                                 | 2.189           |
| 1371447_at   | Rattus norvegicus similar to onzin, mRNA                                                              |             | 9.416                                 | 18.140          |
| 1384946_at   | Rattus norvegicus similar to toll-like receptor 1, mRNA                                               |             | 2.390                                 | 10.500          |
| 1386160_at   | Rattus norvegicus similar to trichohyalin, mRNA                                                       |             | 2.407                                 | 2.246           |
| 1369110_x_at | RT1 class Ib gene (Aw2)                                                                               | RT1-A3      | 8.455                                 | 51.620          |
| 1370429_at   | RT1 class Ib gene (Aw2)                                                                               | RT1-Aw2     | 3.868                                 | 5.718           |
| 1387839_at   | RT1 class Ib gene, H2 TL-like, gre region (N1)                                                        | RT1-N1      | 45.370                                | 8.269           |

Supplementary Data 1. Transcriptome analysis of mRNA extracted from HSV-1 infected Rat brain tissue. The expression of 47 genes was induced at least 2 fold higher in survived rats at 12 hours (rat #1) and 36 (rat #2) hours after recovery from HSE when compared to PBS treated rats.
